# Supplementary material for: Minimal residual disease negativity by next-generation flow cytometry is associated with improved organ response in AL amyloidosis
Source: PubMed Central journal article supplement (PMC7887224; doi:10.1038/s41408-021-00428-0), 2021-02-16
Supplement: 41408_2021_428_MOESM1_ESM.pdf [file 41408_2021_428_MOESM1_ESM.pdf]

## Supplementary Material

### Minimal residual disease by next-generation flow cytometry hinders organ response in AL amyloidosis patients

Giovanni Palladini,<sup>1, 2, 3</sup> Bruno Paiva,<sup>4</sup> Ashutosh Wechalekar,<sup>5</sup> Margherita Massa,<sup>2</sup> Paolo Milani,<sup>1, 2</sup> Marta Lasa,<sup>4</sup> Marco Basset,<sup>1, 2, 3</sup> Leire Burgos,<sup>4</sup> Mario Nuvolone,<sup>1, 2, 3</sup> Ramón Lecumberri,<sup>4</sup> Andrea Foli,<sup>1, 2</sup> Noemi Puig,<sup>6</sup> Melania Sesta,<sup>1, 2, 3</sup> Margherita Bozzola,<sup>1, 2, 3</sup> Pasquale Cascino,<sup>1, 2, 3</sup> Alice Nevone,<sup>1, 2, 3</sup> Jessica Ripepi,<sup>1, 2, 3</sup> Pierpaolo Berti,<sup>7</sup> Simona Casarini,<sup>1, 2</sup> Ombretta Annibali,<sup>7</sup> Alberto Orfao,<sup>6</sup> Jesus San Miguel,<sup>4</sup> Giampaolo Merlini<sup>1, 2, 3</sup>

<sup>1</sup>Amyloidosis Research and Treatment Center, “Fondazione Istituto di Ricovero e Cura a Carattere Scientifico (IRCCS) Policlinico San Matteo”, Pavia, Italy

<sup>2</sup>Biochemistry, Biotechnology and Advanced Diagnostics Laboratory, “Fondazione Istituto di Ricovero e Cura a Carattere Scientifico (IRCCS) Policlinico San Matteo”, Pavia, Italy

<sup>3</sup>Department of Molecular Medicine, University of Pavia, Pavia, Italy

<sup>4</sup>Clinica Universidad de Navarra, Centro de Investigacion Medica Aplicada (CIMA), IDISNA, CIBERONC Pamplona, Pamplona, Spain

<sup>5</sup>National Amyloidosis Centre, University College London Medical School, United Kingdom

<sup>6</sup>Servicio General de Citometría, Universidad de Salamanca, IBSAL, and IBMCC CSIC-USAL, CIBERONC, Salamanca, Spain

<sup>7</sup>Hematology and Stem Cell Transplantation Unit, University Campus Bio-medico, Rome, Italy.

#### Corresponding author:

Prof. Giovanni Palladini, MD, PhD

Amyloidosis Research and Treatment Center

Fondazione IRCCS Policlinico San Matteo

Viale Golgi, 19 – 27100 Pavia, Italy

telephone: +39-0382-502994

fax: +39-0382-502990

e-mail: giovanni.palladini@unipv.it

**Supplementary Table 1.**

| Center                                           | Number (%) of patients evaluated |
|--------------------------------------------------|----------------------------------|
| Pavia Amyloidosis Center (Italy)                 | 45 (49)                          |
| National Amyloidosis Center (London)             | 15 (17)                          |
| Hospital Universitario Puerta del Hierro (Spain) | 11 (12)                          |
| Salamanca Hospital (Spain)                       | 4 (4)                            |
| Hospital Universitario Dr Peset (Spain)          | 4 (4)                            |
| Hospital Universitario Son Espases (Spain)       | 2 (2)                            |
| Hospital de Cabuenes (Spain)                     | 2 (2)                            |
| Hospital de Galdakao (Spain)                     | 2 (2)                            |
| Hospital Son Llatzer (Spain)                     | 2 (2)                            |
| Clinical Universidad de Navarra (Spain)          | 1 (1)                            |
| Complejo Hospitalario de Ourense (Spain)         | 1 (1)                            |
| Burgos Hospital (Spain)                          | 1 (1)                            |
| Costa del Sol Hospital (Spain)                   | 1 (1)                            |
| Valladolid Hospital (Spain)                      | 1 (1)                            |

Supplementary Table 2. Logistic regression for organ response.

| <b>Variable</b>                              | <b>OR (95% CI)</b> | <b>P</b> |
|----------------------------------------------|--------------------|----------|
| <b>Time to MRD assessment from aCR</b>       |                    |          |
| Cardiac response                             | 1.03 (0.96, 1.10)  | P=0.157  |
| Renal response                               | 0.99 (0.97, 1.01)  | P=0.653  |
| <b>Time to aCR assessment from diagnosis</b> |                    |          |
| Cardiac response                             | 0.97 (0.86, 1.08)  | P=0.154  |
| Renal response                               | 0.95 (0.84, 1.08)  | P=0.420  |

aCR, amyloid complete response; CI, confidence interval; MRD, minimal residual disease; OR, odds ratio.
